# Supplementary material
Source: Springer Nature journal article supplement (https://www.springermedizin.de/resource/supplementary/13054_2010_8685_MOESM1_ESM.pdf/9732786)

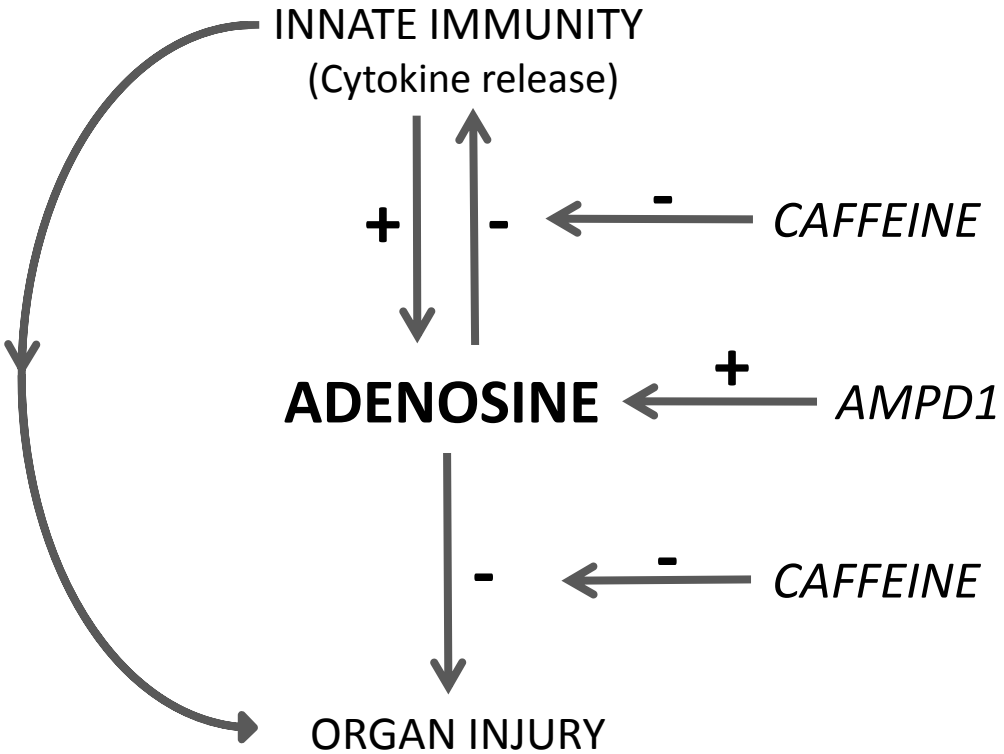

INNATE IMMUNITY  
(Cytokine release)

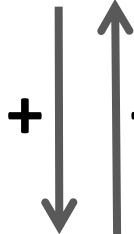

CAFFEINE

**ADENOSINE**

AMPD1

CAFFEINE

ORGAN INJURY

Supplement: MOESM1 [file 9732786]
